# Supplementary material
Source: publisher figshare collection journal article supplement (https://frontiersin.figshare.com/ndownloader/files/35065474)
Supplement: Supplementary file 1 [file 35065474]

Supplementary Material

**Table S1. Primary theory citation by discipline**

| **Discipline (lead author)** | **Count** | **Percent** |
| --- | --- | --- |
| **Computer Science & Modeling** | 6 | **100.0%** |
| Push-Pull | 1 | 33.3% |
| Env Mig Frameworks | 1 | 17.0% |
| Livelihoods Framework | 1 | 17.0% |
| NELM | 1 | 17.0% |
| Other Theories | 2 | 16.0% |
| **Economics** | 20 | **100.0%** |
| Neoclassical | 1 | 50.0% |
| NELM | 2 | 15.0% |
| Livelihoods Framework | 3 | 10.0% |
| Other Theories | 10 | 10.0% |
| Env Mig Frameworks | 1 | 5.0% |
| No Theory | 2 | 5.0% |
| Push-Pull | 1 | 5.0% |
| **Geography** | 24 | **100.0%** |
| Other Theories | 1 | 25.0% |
| Env Mig Frameworks | 5 | 20.8% |
| NELM | 2 | 16.7% |
| Livelihoods Framework | 4 | 8.3% |
| No Theory | 1 | 8.3% |
| Push-Pull | 2 | 8.3% |
| Aspirations & Caps | 6 | 4.2% |
| Neoclassical | 2 | 4.2% |
| Theories Sust Mig | 1 | 4.2% |
| **Natural & Physical Sciences** | 5 | **100.0%** |
| NELM | 1 | 20.0% |
| No Theory | 1 | 20.0% |
| Other Theories | 2 | 40.0% |
| Push-Pull | 1 | 20.0% |
| **Other Social Sciences** | 5 | **100.0%** |
| Env Mig Frameworks | 2 | 40.0% |
| NELM | 1 | 20.0% |
| Neoclassical | 1 | 20.0% |
| No Theory | 1 | 20.0% |
| **Political Science** | 4 | **100.0%** |
| NELM | 2 | 50.0% |
| Other Theories | 2 | 50.0% |
| **Sociology & Demography** | 11 | **100.0%** |
| NELM | 1 | 36.4% |
| Env Mig Frameworks | 1 | 9.1% |
| Livelihoods Framework | 1 | 9.1% |
| Mobility Transition / Migration Hump | 4 | 9.1% |
| Neoclassical | 1 | 9.1% |
| No Theory | 1 | 9.1% |
| Other Theories | 1 | 9.1% |
| Theories Sust Mig | 1 | 9.1% |

**Table S2. Primary theory citation by category of study**

| **Study Category** | **Count** | **Percent** |
| --- | --- | --- |
| **Category 1: Repurposed demographic data** | **22** | **100.0%** |
| Neoclassical | 6 | 27.3% |
| NELM | 4 | 18.2% |
| Livelihoods Framework | 3 | 13.6% |
| Other Theories | 2 | 9.1% |
| Push-Pull | 2 | 9.1% |
| Env Mig Frameworks | 2 | 9.1% |
| No Theory | 2 | 9.1% |
| Theories Sust Mig | 1 | 4.5% |
| **Category 2: Migration focused survey** | **25** | **100.0%** |
| NELM | 10 | 40.0% |
| Other Theories | 5 | 20.0% |
| Livelihoods Framework | 3 | 12.0% |
| Env Mig Frameworks | 3 | 12.0% |
| Neoclassical | 2 | 8.0% |
| Theories Sust Mig | 1 | 4.0% |
| Aspirations & Caps | 1 | 4.0% |
| **Category 3: Qualitative field studies** | **14** | **100.0%** |
| Other Theories | 4 | 28.6% |
| Env Mig Frameworks | 4 | 28.6% |
| No Theory | 3 | 21.4% |
| NELM | 1 | 7.1% |
| Push-Pull | 1 | 7.1% |
| Neoclassical | 1 | 7.1% |
| **Category 4: Projections and future scenarios** | **14** | **100.0%** |
| Neoclassical | 4 | 28.6% |
| Push-Pull | 3 | 21.4% |
| Other Theories | 3 | 21.4% |
| No Theory | 1 | 7.1% |
| NELM | 1 | 7.1% |
| Mobility Transition / Migration Hump | 1 | 7.1% |
| Env Mig Frameworks | 1 | 7.1% |
| **Grand Total** | **75** |  |

**Table S3. Studies in alphabetical order by category, discipline of lead author, and theory employed**

*Categories include 1: Repurposed demographic data, 2: Migration focused survey, 3: Qualitative field studies, 4: Projections and future scenarios.*

| **Journal Article Full APA Citation** | **Category (primary)** | **Category (secondary)** | **Discipline of lead author** | **Theory (primary)** | **Theory (secondary)** |
| --- | --- | --- | --- | --- | --- |
| Abel, G. J., Brottrager, M., Cuaresma, J. C., & Muttarak, R. (2019). Climate, conflict and forced migration. Global Environmental Change, 54, 239-249. | 1 | NA | Demography | Env Mig Frameworks | None |
| Abu, M., Codjoe, S. N. A., & Sward, J. (2014). Climate change and internal migration intentions in the forest-savannah transition zone of Ghana. Population and Environment, 35(4), 341-364. | 2 | 3 | Demography | NELM | None |
| Adams, H. (2016). Why populations persist: mobility, place attachment and climate change. Population and Environment, 37(4), 429-448. | 2 | NA | Geography | Other Theories | Env Mig Frameworks |
| Adams, H., & Kay, S. (2019). Migration as a human affair: Integrating individual stress thresholds into quantitative models of climate migration. Environmental Science & Policy, 93, 129-138. | 2 | NA | Geography | Other Theories | None |
| Afifi, T. (2011). Economic or environmental migration? The push factors in Niger. International Migration, 49, e95-e124. | 3 | NA | Economics | Neoclassical | Env Mig Frameworks |
| Alscher, S. (2011). Environmental degradation and migration on Hispaniola Island. International Migration, 49, e164-e188. | 3 | NA | Social Sciences (Sociology) | No Theory | None |
| Anderson, K. J., & Silva, J. A. (2020). Weather-related influences on rural-to-urban migration: A spectrum of attribution in Beira, Mozambique. Global Environmental Change, 65, 102193. | 3 | 2 | Geography | Env Mig Frameworks | Hist-Struct Theories |
| Anglewicz, P., & Myroniuk, T. W. (2018). Shocks and migration in Malawi. Demographic Research, 38, 321-334. | 1 | NA | Demography | No Theory | None |
| Backhaus, A., Martinez-Zarzoso, I., & Muris, C. (2015). Do climate variations explain bilateral migration? A gravity model analysis. IZA Journal of Migration, 4(1), 1-15. | 1 | NA | Economics | Neoclassical | None |
| Barbieri, A. F., Domingues, E., Queiroz, B. L., Ruiz, R. M., Rigotti, J. I., Carvalho, J. A., & Resende, M. F. (2010). Climate change and population migration in Brazil’s Northeast: scenarios for 2025–2050. Population and environment, 31(5), 344-370. | 4 | 1 | City and Regional Planning | Env Mig Frameworks | Neoclassical |
| Barbieri, A. F., Domingues, E., Queiroz, B. L., Ruiz, R. M., Rigotti, J. I., Carvalho, J. A., & Resende, M. F. (2010). Climate change and population migration in Brazil’s Northeast: scenarios for 2025–2050. Population and environment, 31(5), 344-370. | 4 | 1 | Demography | Neoclassical | None |
| Bardsley, D. K., & Hugo, G. J. (2010). Migration and climate change: examining thresholds of change to guide effective adaptation decision-making. Population and Environment, 32(2), 238-262. | 3 | NA | Geography | Push-Pull | None |
| Bekaert, E., Ruyssen, I., & Salomone, S. (2021). Domestic and international migration intentions in response to environmental stress: A global cross-country analysis. Journal of Demographic Economics, 1-54. | 1 | 2 | Economics | Livelihoods Framework | Other Theories |
| Bell, A. R., Wrathall, D. J., Mueller, V., Chen, J., Oppenheimer, M., Hauer, M., ... & Slangen, A. B. A. (2021). Migration towards Bangladesh coastlines projected to increase with sea-level rise through 2100. Environmental Research Letters, 16(2), 024045. | 4 | 1 | Resource Ecology and Management | Push-Pull | Neoclassical |
| Cai, R., Feng, S., Oppenheimer, M., & Pytlikova, M. (2016). Climate variability and international migration: The importance of the agricultural linkage. Journal of Environmental Economics and Management, 79, 135-151. | 1 | NA | Economics | Neoclassical | Env Mig Frameworks |
| Call, M., & Gray, C. (2020). Climate anomalies, land degradation, and rural out-migration in Uganda. Population and Environment, 41(4), 507–528. | 2 | 1 | Geography | NELM | Push-Pull |
| Cameron, M. P. (2018). Climate change, internal migration, and the future spatial distribution of population: a case study of New Zealand. Population and Environment, 39(3), 239-260. | 4 | 1 | Economics | Neoclassical | None |
| Chen, M., & Caldiera, K. (2020). Climate change as an incentive for future human migration. Earth System Dynamics (11) 875-883 | 4 | 1 | Ecology/climate/modeler | No Theory | Other Theories |
| Chindarkar, N. (2012). Gender and climate change-induced migration: proposing a framework for analysis. Environmental Research Letters, 7(2), 025601. | 1 | NA | Public policy | Other Theories | None |
| Dallmann, I., & Millock, K. (2017). Climate variability and inter-state migration in India. CESifo Economic Studies, 63(4), 560-594. | 1 | NA | Economics | Neoclassical | Push-Pull |
| Davis, K. F., Bhattachan, A., D’Odorico, P., & Suweis, S. (2018). A universal model for predicting human migration under climate change: Examining future sea level rise in Bangladesh. Environmental Research Letters, 13(6). | 4 | NA | Geography | Neoclassical | Push-Pull |
| De Haas, H. (2011). Mediterranean migration futures: Patterns, drivers and scenarios. Global Environmental Change, 21, S59-S69. | 4 | 1 | Sociology | Mobility Transition / Migration Hump | Theories Sust Mig |
| Doevenspeck, M. (2011). The thin line between choice and flight: environment and migration in rural Benin. International Migration, 49, e50-e68. | 2 | 3 | Geography | Theories Sust Mig | Neoclassical |
| Entwisle, B., Verdery, A., & Williams, N. (2020). Climate Change and Migration: New Insights from a Dynamic Model of Out-Migration and Return Migration. American Journal of Sociology, 125(6), 1469-1512. | 4 | 2 | Sociology | Other Theories | Theories Sust Mig |
| Fan, Q., Fisher-Vanden, K., & Klaiber, H. A. (2018). Climate change, migration, and regional economic impacts in the United States. Journal of the Association of Environmental and Resource Economists, 5(3), 643-671. | 4 | 1 | Economics | Neoclassical | None |
| Feng, S., Krueger, A. B., & Oppenheimer, M. (2010). Linkages among climate change, crop yields and Mexico–US cross-border migration. Proceedings of the National Academy of Sciences, 107(32), 14257-14262. | 1 | 4 | Economics | Push-Pull | None |
| Grace, K., Hertrich, V., Singare, D., & Husak, G. (2018). Examining rural Sahelian out-migration in the context of climate change: An analysis of the linkages between rainfall and out-migration in two Malian villages from 1981 to 2009. World Development, 109, 187-196. | 2 | NA | Geography | Livelihoods Framework | NELM |
| Gray, C., & Mueller, V. (2011). Drought and Population Mobility in Rural Ethiopia. World Development, 40(1), 134–145. | 1 | NA | Geography | Env Mig Frameworks | None |
| Gray, C., & Wise, E. (2016). Country-specific effects of climate variability on human migration. Climatic change, 135(3-4), 555-568. | 2 | NA | Geography | NELM | None |
| Groth, J., Ide, T., Sakdapolrak, P., Kassa, E., & Hermans, K. (2020). Deciphering interwoven drivers of environment-related migration–A multisite case study from the Ethiopian highlands. Global Environmental Change, 63, 102094. | 3 | NA | Computational Landscape Ecology | Env Mig Frameworks | Aspirations & Caps |
| Hailegiorgis, A., Crooks, A., & Cioffi-Revilla, C. (2018). An agent-based model of rural households’ adaptation to climate change. Journal of Artificial Societies and Social Simulation, 21(4). | 4 | NA | Computational Social Science | Other Theories | Livelihoods Framework |
| Hassani-Mahmooei, B., & Parris, B. W. (2012). Climate change and internal migration patterns in Bangladesh: an agent-based model. Environment and Development Economics, 17(6), 763-780. | 4 | NA | Computer Science | Push-Pull | None |
| Hauer, M. E. (2017). Migration induced by sea-level rise could reshape the US population landscape. Nature Climate Change, 7(5), 321-325. | 1 | NA | Sociology | Theories Sust Mig | None |
| Henderson, J. V., Storeygard, A., & Deichmann, U. (2017). Has climate change driven urbanization in Africa?. Journal of development economics, 124, 60-82. | 1 | NA | Economics | No Theory | None |
| Hermans, K., & Garbe, L. (2019). Droughts, livelihoods, and human migration in northern Ethiopia. Regional Environmental Change, 19(4), 1101-1111. | 2 | 3 | Computer Science / Landscape Ecology | NELM | Livelihoods Framework |
| Islam, M. R., & Hasan, M. (2016). Climate-induced human displacement: A case study of Cyclone Aila in the south-west coastal region of Bangladesh. Natural hazards, 81(2), 1051-1071. | 3 | 2 | Social Work | Env Mig Frameworks | Other Theories |
| Jha, C. K., Gupta, V., Chattopadhyay, U., & Sreeraman, B. A. (2018). Migration as adaptation strategy to cope with climate change. International Journal of Climate Change Strategies and Management, 10(1), 121-141. https://doi.org/10.1108/IJCCSM-03-2017-0059 | 2 | NA | Economics | NELM | None |
| Kaenzig, R.. (2015). Can glacial retreat lead to migration? A critical discussion of the impact of glacier shrinkage upon population mobility in the Bolivian Andes. Population and Environment, 36(4), 480-496. | 3 | NA | Geography | No Theory | None |
| Kelman, I., Orlowska, J., Upadhyay, H., Stojanov, R., Webersik, C., Simonelli, A. C., ... & Němec, D. (2019). Does climate change influence people’s migration decisions in Maldives?. Climatic change, 153(1), 285-299. | 3 | NA | Engineering | Other Theories | None |
| Kniveton, D. R., Smith, C. D., & Black, R. (2012). Emerging migration flows in a changing climate in dryland Africa. Nature Climate Change, 2(6), 444–447. | 4 | 1 | Geography | Other Theories | None |
| Koubi, V., Spilker, G., Schaffer, L., & Böhmelt, T. (2016). The role of environmental perceptions in migration decision-making: evidence from both migrants and non-migrants in five developing countries. Population and Environment, 38(2), 134–163. | 2 | NA | International studies | NELM | Push-Pull |
| Lalou, R., & Delaunay, V. (2017). “Seasonal migration and climate change in rural Senegal: a form of adaptation or failure to adapt?” Chapter 14 in: Sultan, B., et al. Rural societies in the face of climatic and environmental changes in West Africa. Marseille, France: IRD Editions. | 2 | 1 | Sociology | NELM | Livelihoods Framework |
| Liao, C., Morreale, S. J., Kassam, K. A. S., Sullivan, P. J., & Fei, D. (2014). Following the Green: Coupled pastoral migration and vegetation dynamics in the Altay and Tianshan Mountains of Xinjiang, China. Applied Geography, 46, 61-70. | 3 | NA | Geography | No Theory | None |
| Liehr, S., Drees, L., & Hummel, D. (2016). Migration as societal response to climate change and land degradation in Mali and Senegal. In Adaptation to Climate Change and Variability in Rural West Africa (pp. 147-169). Springer, Cham. | 2 | 4 | Physics | Other Theories | None |
| Loebach, P. (2016). Household migration as a livelihood adaptation in response to a natural disaster: Nicaragua and Hurricane Mitch. Population and Environment, 38(2), 185-206. | 1 | NA | Sociology | NELM | Livelihoods Framework |
| Lu, X., Wrathall, D. J., Sundsøy, P. R., Nadiruzzaman, M., Wetter, E., Iqbal, A., Qureshi, T., Tatem, A., Canright, G., Engø-Monsen, K., & Bengtsson, L. (2016). Unveiling hidden migration and mobility patterns in climate stressed regions: A longitudinal study of six million anonymous mobile phone users in Bangladesh. Global Environmental Change, 38, 1–7. https://doi.org/10.1016/j.gloenvcha.2016.02.002 | 1 | NA | Computer Science | Livelihoods Framework | Env Mig Frameworks |
| Maharjan, A., de Campos, R. S., Singh, C., Das, S., Srinivas, A., Bhuiyan, M. R. A., ... & Vincent, K. (2020). Migration and household adaptation in climate-sensitive hotspots in South Asia. Current Climate Change Reports, 6(1), 1-16. | 2 | 3 | Economics | Livelihoods Framework | Aspirations & Caps |
| Marchiori, L., Maystadt, J. F., & Schumacher, I. (2012). The impact of weather anomalies on migration in sub-Saharan Africa. Journal of Environmental Economics and Management, 63(3), 355-374. | 2 | NA | Economics | Neoclassical | Push-Pull |
| Mastrorillo, M., Licker, R., Bohra-Mishra, P., Fagiolo, G., Estes, L. D., & Oppenheimer, M. (2016). The influence of climate variability on internal migration flows in South Africa. Global Environmental Change, 39, 155-169. | 1 | NA | Economics | Neoclassical | None |
| Maurel, M., & Tuccio, M. (2016). Climate instability, urbanisation and international migration. The Journal of Development Studies, 52(5), 735-752. | 2 | 1 | Economics | NELM | Other Theories |
| McLeman, R. A., & Ploeger, S. K. (2012). Soil and its influence on rural drought migration: insights from Depression-era Southwestern Saskatchewan, Canada. Population and Environment, 33(4), 304-332. | 3 | 1 | Geography | Other Theories | None |
| Milan, A., & Ho, R. (2014). Livelihood and migration patterns at different altitudes in the Central Highlands of Peru. Climate and Development, 6(1), 69-76. | 2 | NA | Governance, Policy, Interdisciplinary | Neoclassical | NELM |
| Milan, A., & Ruano, S. (2014). Rainfall variability, food insecurity and migration in Cabricán, Guatemala. Climate and Development, 6(1), 61-68. | 2 | 3 | Geography | NELM | Livelihoods Framework |
| Mueller, V., Gray, C., & Kosec, K. (2014). Heat stress increases long-term human migration in rural Pakistan. Nature climate change, 4(3), 182-185. | 1 | NA | Economics | Neoclassical | Other Theories |
| Nawrotzki, R. J., Hunter, L. M., Runfola, D. M., & Riosmena, F. (2015). Climate change as a migration driver from rural and urban Mexico. Environmental Research Letters, 10(11), 114023. | 1 | NA | Sociology | NELM | None |
| Oakes, R. (2019). Culture, climate change and mobility decisions in Pacific Small Island Developing States. Population and Environment, 40(4), 480-503. | 2 | 3 | Geography | Other Theories | Env Mig Frameworks |
| Olaniyan, A., & Okeke-Uzodike, U. (2015). Desperate guests, unwilling hosts: Climate Change-induced migration and farmer-herder conflicts in southwestern Nigeria. Conflict Studies Quarterly, (10): 23-40. | 3 | NA | Political Science | Other Theories | None |
| Parsons, L. (2019). Structuring the emotional landscape of climate change migration: Towards climate mobilities in geography. Progress in Human Geography, 43(4), 670-690. | 3 | NA | Geography | Other Theories | Hist-Struct Theories |
| Parsons, L., & Nielsen, J. Ø. (2020). The Subjective Climate Migrant: Climate Perceptions, Their Determinants, and Relationship to Migration in Cambodia. Annals of the American Association of Geographers, 1-18. | 2 | 3 | Geography | Livelihoods Framework | Hist-Struct Theories |
| Pradhan, K. C., & Narayanan, K. (2019). Weather variation and temporary labor migration: a panel data analysis for select semi-arid villages in India. Migration and Development, 9(2), 291–322. | 1 | NA | Economics | NELM | None |
| Raoul, K. (2015). Can glacial retreat lead to migration? A critical discussion of the impact of glacier shrinkage upon population mobility in the Bolivian Andes. Population and Environment, 36(4), 480-496. | 3 | NA | Geography | Env Mig Frameworks | None |
| Robinson, C., Dilkina, B., & Moreno-Cruz, J. (2020). Modeling migration patterns in the USA under sea level rise. PloS One, 15(1), e0227436. | 4 | 1 | Computational Science | Push-Pull | None |
| Roland, H. B., & Curtis, K. J. (2020). The differential influence of geographic isolation on environmental migration: a study of internal migration amidst degrading conditions in the central Pacific. Population and Environment, 42(2), 161-182. | 1 | NA | Environmental science | NELM | Aspirations & Caps |
| Sedova, B., & Kalkuhl, M. (2020). Who are the climate migrants and where do they go? Evidence from rural India. World Development, 129, 104848. | 1 | NA | Economics | Other Theories | None |
| Singh, C. (2019). Migration as a driver of changing household structures: Implications for local livelihoods and adaptation. Migration and Development, 8(3), 301-319. | 2 | NA | International Development | NELM | Aspirations & Caps |
| Suckall, N., Fraser, E., & Forster, P. (2017). Reduced migration under climate change: evidence from Malawi using an aspirations and capabilities framework. Climate and Development, 9(4), 298–312. | 2 | NA | Geography | Aspirations & Caps | None |
| Thiede, B. C., & Gray, C. L. (2017). Heterogeneous climate effects on human migration in Indonesia. Population and Environment, 39(2), 147-172. | 1 | 2 | Sociology | Livelihoods Framework | Env Mig Frameworks |
| van der Geest, K., Burkett, M., Fitzpatrick, J., Stege, M., & Wheeler, B. (2020). Climate change, ecosystem services and migration in the Marshall Islands: are they related?. Climatic Change, 161: 109-127. | 2 | 1 | Geography | Env Mig Frameworks | Livelihoods Framework |
| van der Geest, K., Khoa, V. N., & Thao, N. C. (2014). Internal migration in the Upper Mekong Delta, Viet Nam: What is the role of climate related stressors?. Asia-Pacific Population Journal, 29(2), 25-41. | 2 | 3 | Geography | Env Mig Frameworks | Livelihoods Framework |
| van der Geest, K., Vrieling, A., & Dietz, T. (2010). Migration and environment in Ghana: A cross-district analysis of human mobility and vegetation dynamics. Environment and Urbanization, 22(1), 107–123. | 1 | NA | Geography | Push-Pull | Hist-Struct Theories |
| Vinke, K., Rottmann, S., Gornott, C., Zabre, P., et al. (2021) Is migration an effective adaptation to climate-related agricultural distress in sub-Saharan Africa?. Population & Environment. | 3 | NA | Political Science | NELM | None |
| Viswanathan, B., & Kumar, K. K. (2015). Weather, agriculture and rural migration: evidence from state and district level migration in India. Environment and Development Economics, 20(4), 469-492. | 1 | 2 | Economics | Neoclassical | Push-Pull |
| Walsh, S. J., Malanson, G. P., Entwisle, B., Rindfuss, R. R., Mucha, P. J., Heumann, B. W., ... & Ding, D. (2013). Design of an agent-based model to examine population–environment interactions in Nang Rong District, Thailand. Applied Geography, 39, 183-198. | 4 | 2 | Geography | NELM | None |
| Warner, K., Hamza, M., Oliver-Smith, A., Renaud, F., & Julca, A. (2010). Climate change, environmental degradation and migration. Natural Hazards, 55(3), 689-715. | 2 | 3 | Economics | Env Mig Frameworks | Forced Migration |
| Zander, K. K., Richerzhagen, C., & Garnett, S. T. (2019). Human mobility intentions in response to heat in urban South East Asia. Global Environmental Change, 56, 18-28. | 2 | 4 | Economics | Other Theories | None |
